# Supplementary material for: Self-healing hybrids fabricated by metal complexation with imidazole-containing silsesquioxane nanoparticles
Source: Royal Society of Chemistry journal article supplement (doi:10.1039/d0qm00225a), 2020-01-01
Supplement: d0qm00225a2.pdf [file d0qm00225a2.pdf]

## Supplementary Material for

# Self-healable hybrids fabricated by metal complexation with imidazole-containing silsesquioxane nanoparticles

Yusuke Sasaki<sup>†</sup>, and Hideharu Mori<sup>\*†</sup>

<sup>†</sup>Department of Organic Materials Science, Graduate School of Organic Materials Science, Yamagata

University, 4-3-16, Jonan, Yonezawa, 992-8510, Japan

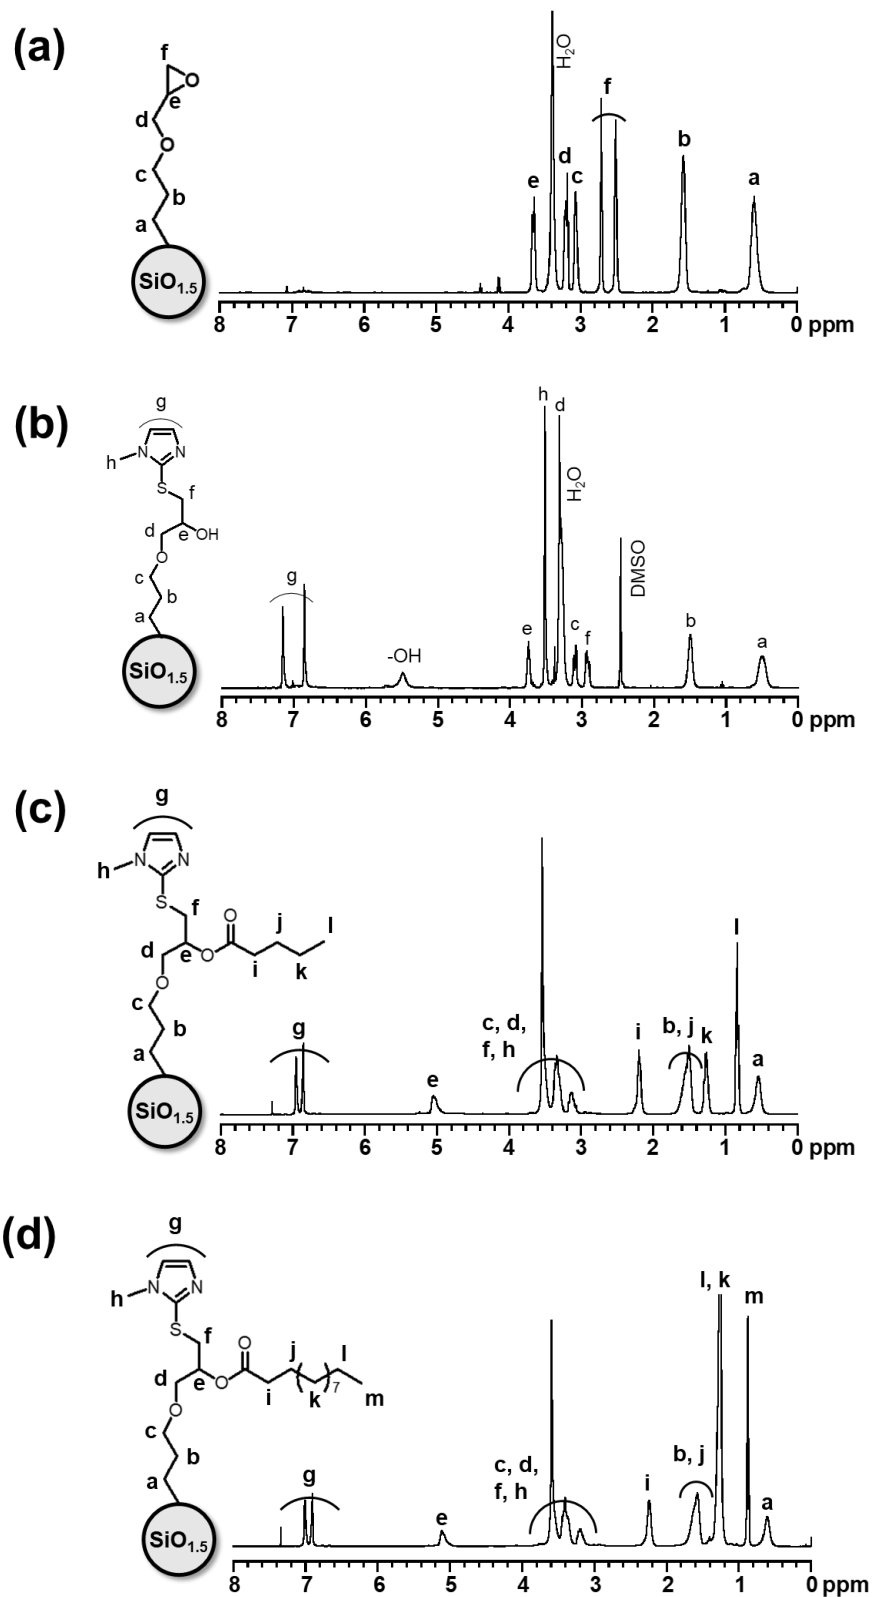

Figure S1.  $^1\text{H}$  NMR spectra of (a) (Gly-SiO<sub>1.5</sub>)<sub>n</sub>, (b) (MI/OH-SiO<sub>1.5</sub>)<sub>n</sub> (DMSO-*d*<sub>6</sub>), (c) (MI/Bu-SiO<sub>1.5</sub>)<sub>n</sub> and (d) (MI/Ud-SiO<sub>1.5</sub>)<sub>n</sub> (CDCl<sub>3</sub>)

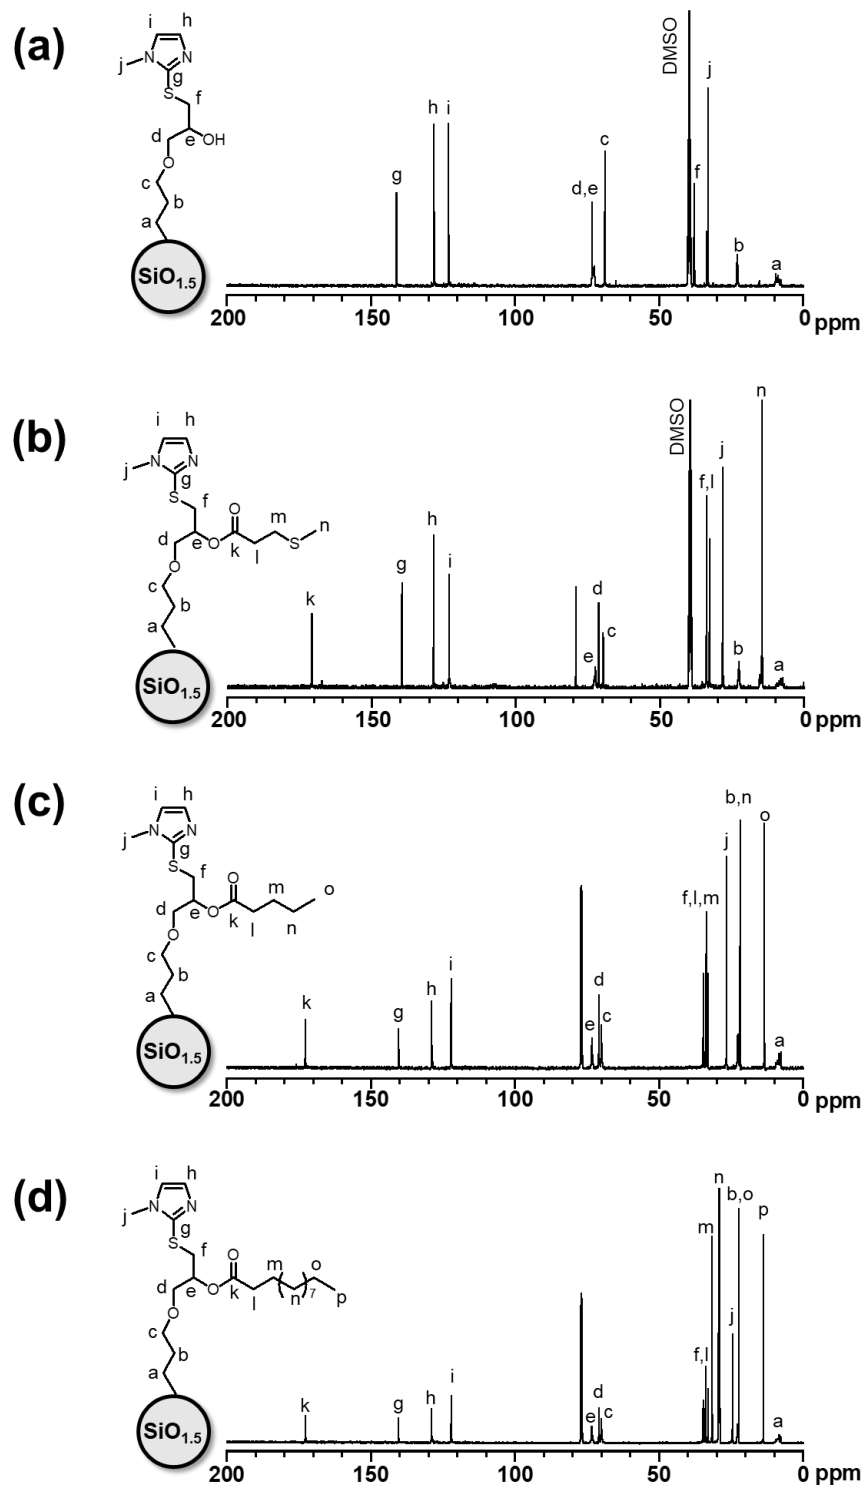

Figure S2.  $^{13}\text{C}$  NMR spectra of (a)  $(\text{MI}/\text{OH}-\text{SiO}_{1.5})_n$  (b)  $(\text{MI}/\text{MT}-\text{SiO}_{1.5})_n$  (DMSO- $d_6$ ), (c)  $(\text{MI}/\text{Bu}-\text{SiO}_{1.5})_n$  and (d)  $(\text{MI}/\text{Ud}-\text{SiO}_{1.5})_n$  ( $\text{CDCl}_3$ )

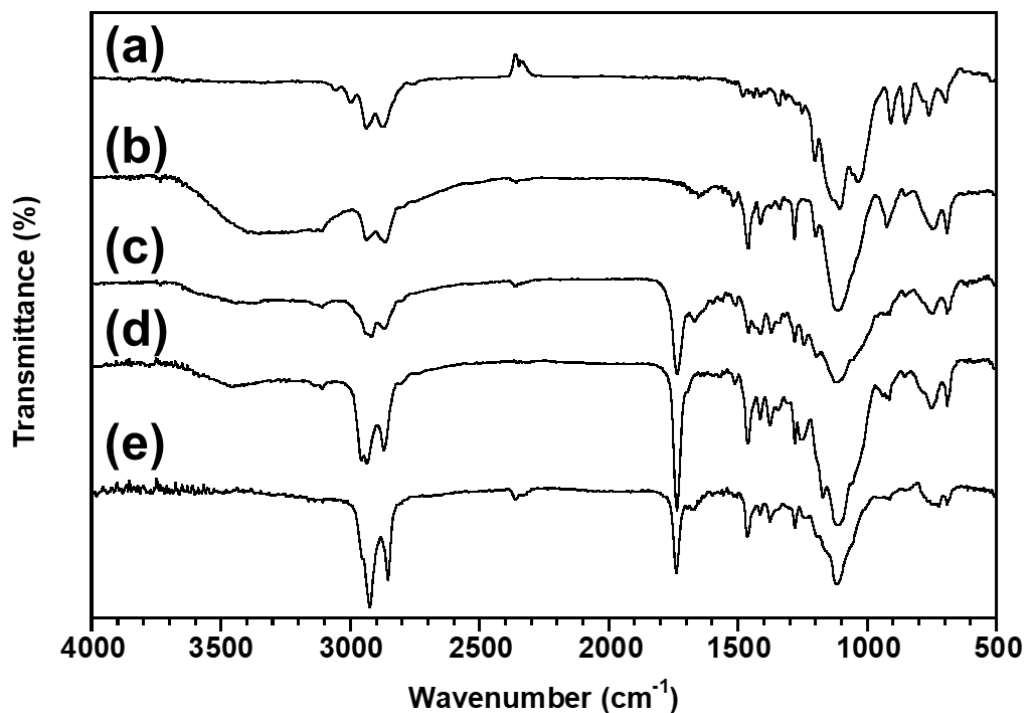

Figure S3. FT-IR spectra of (a) (Gly-SiO<sub>1.5</sub>)<sub>n</sub>, (b) (MI/OH-SiO<sub>1.5</sub>)<sub>n</sub>, (c) (MI/MT-SiO<sub>1.5</sub>)<sub>n</sub>, (d) (MI/Bu-SiO<sub>1.5</sub>)<sub>n</sub>, and (e) (MI/Ud-SiO<sub>1.5</sub>)<sub>n</sub>.

Table S1. Solubility of SQ-NPs.

| Entry                                                | H <sub>2</sub> O | MeOH | DMSO | DMF | Ace | THF | CHCl <sub>3</sub> | Et <sub>2</sub> O | Hex |
|------------------------------------------------------|------------------|------|------|-----|-----|-----|-------------------|-------------------|-----|
| (Gly-SiO <sub>1.5</sub> ) <sub>n</sub> <sup>a)</sup> | -                | -    | +    | -   | -   | -   | -                 | -                 | -   |
| (MI/OH-SiO <sub>1.5</sub> ) <sub>n</sub>             | -                | -    | +    | +   | -   | +   | +                 | -                 | -   |
| (MI/MT-SiO <sub>1.5</sub> ) <sub>n</sub>             | -                | -    | +    | +   | -   | +   | +                 | -                 | -   |
| (MI/Bu-SiO <sub>1.5</sub> ) <sub>n</sub>             | -                | -    | +    | +   | -   | +   | +                 | -                 | -   |
| (MI/Ud-SiO <sub>1.5</sub> ) <sub>n</sub>             | -                | -    | -    | -   | -   | +   | +                 | -                 | -   |

+ = soluble at r.t. (1 mg/ml), - = insoluble at r.t., time = 1 day, a) time = 1 week.

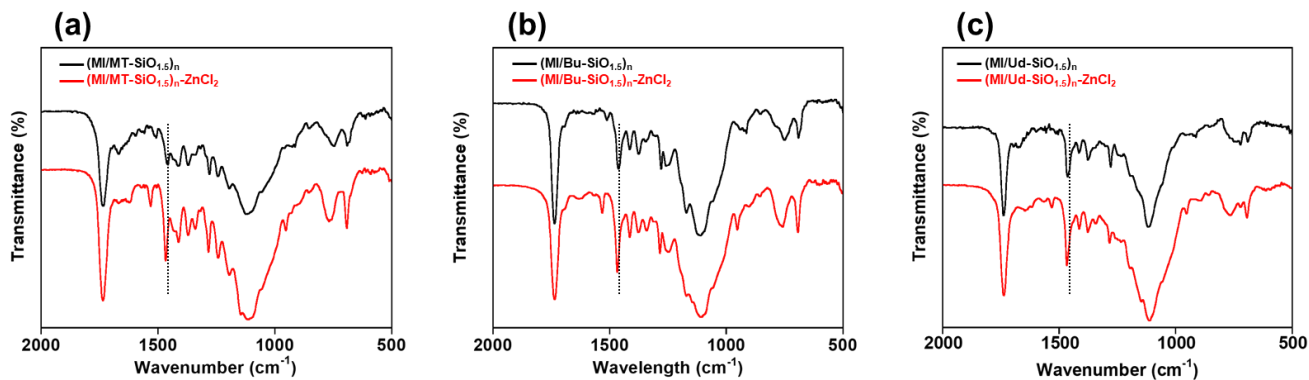

Figure S4. FT-IR spectra of (a) (MI/MT-SiO<sub>1.5</sub>)<sub>n</sub>-ZnCl<sub>2</sub>, (b) (MI/Bu-SiO<sub>1.5</sub>)<sub>n</sub>-ZnCl<sub>2</sub>, and (c) (MI/Ud-SiO<sub>1.5</sub>)<sub>n</sub>-ZnCl<sub>2</sub> before and after metal complexation, respectively.

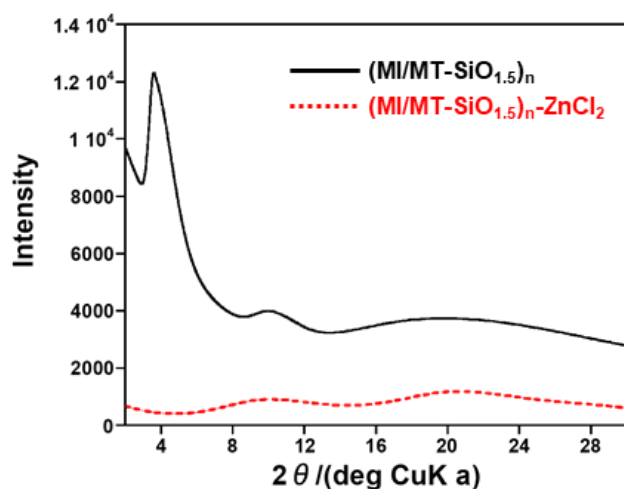

Figure S5. XRD profiles of (MI/MT-SiO<sub>1.5</sub>)<sub>n</sub>-ZnCl<sub>2</sub> before and after metal complexation.

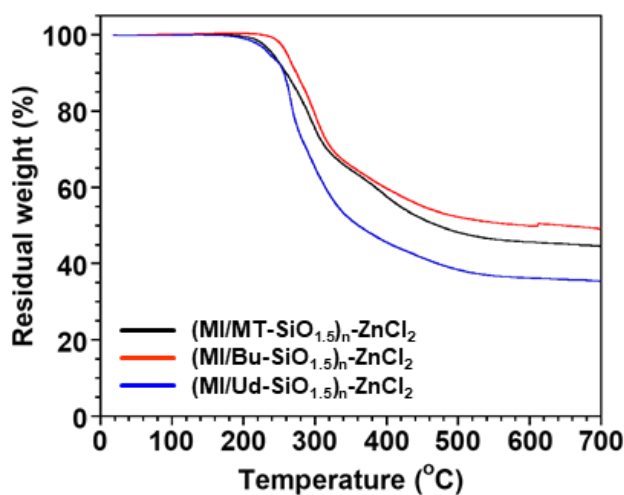

Figure S6. TGA thermograms of the imidazole-containing dual functional silsesquioxane nanoparticles (SQ-NPs) after metal complexation with ZnCl<sub>2</sub>.

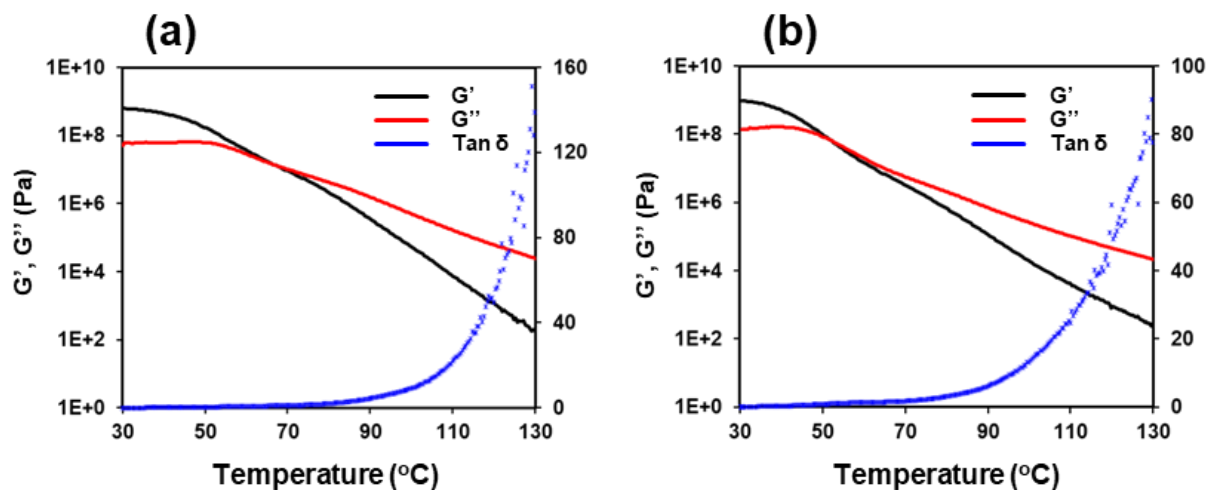

Figure S7.  $G'$ ,  $G''$ , and  $\tan \delta$  ( $G''/G'$ ) values of (a)  $(\text{MI}/\text{Bu}-\text{SiO}_{1.5})_n-\text{ZnCl}_2$  and (b)  $(\text{MI}/\text{Ud}-\text{SiO}_{1.5})_n-\text{ZnCl}_2$  recorded during the temperature dispersion tests in a range from 30 °C to 130 °C (2 °C/min) at a constant frequency of 1Hz at an applied strain ( $\gamma$ ) of 0.01 to 0.1%.

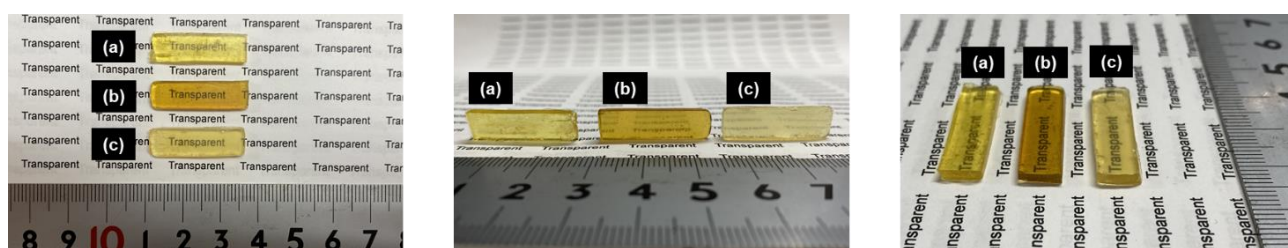

Figure S8. Fabricated rectangular (length; 25 mm, width; 7 mm, height; 2 mm) films; (a)  $(\text{MI}/\text{MT}-\text{SiO}_{1.5})_n-\text{ZnCl}_2$ , (b)  $(\text{MI}/\text{Bu}-\text{SiO}_{1.5})_n-\text{ZnCl}_2$ , and (c)  $(\text{MI}/\text{Ud}-\text{SiO}_{1.5})_n-\text{ZnCl}_2$  for flexural stress-strain test.

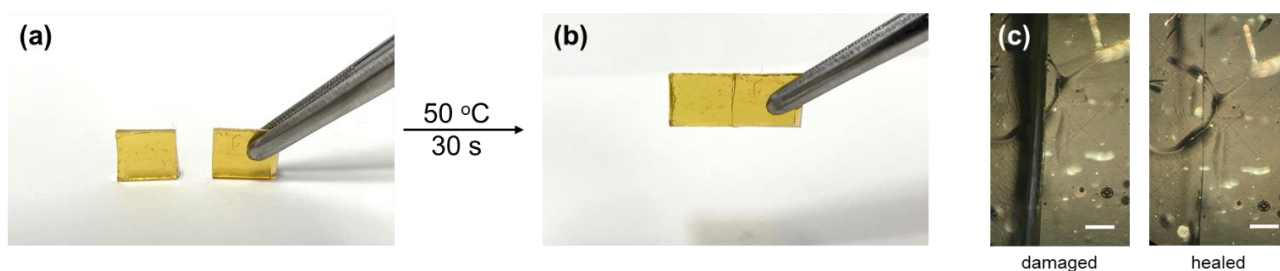

Figure S9. Preliminary self-healing test for  $(\text{MI}/\text{Bu}-\text{SiO}_{1.5})_n-\text{ZnCl}_2$ ; (a) cut specimen into two pieces, (b) healed specimen after 30 s of contacting the damaged surface at 50 °C, (c) microscopic images of a film before (left) and after (right) healing at 50 °C. Scale bar 500  $\mu\text{m}$ .

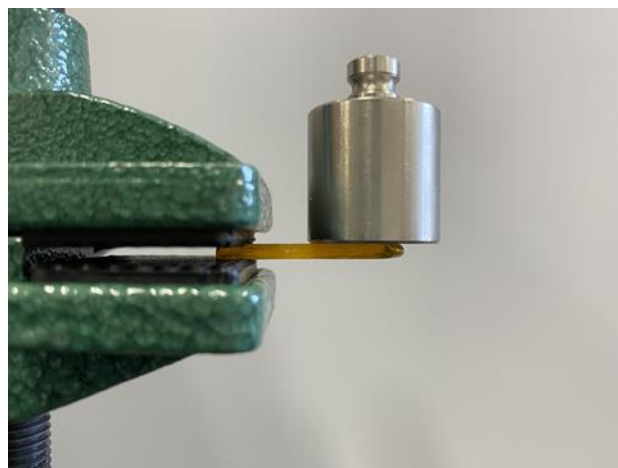

Figure S10. The healed specimen at 50 °C for 24 h, (MI/Bu-SiO<sub>1.5</sub>)<sub>n</sub>-ZnCl<sub>2</sub>, sustained the load of a 50 g.

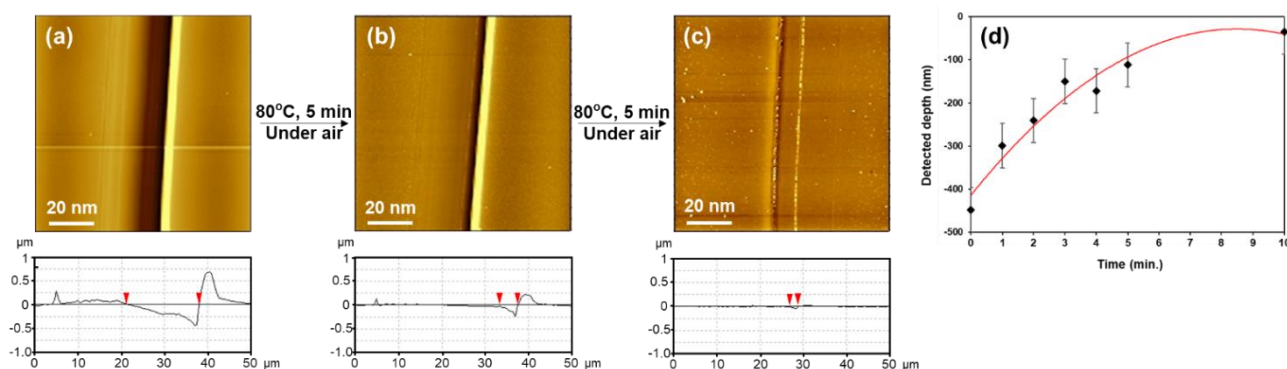

Figure S11. Time-dependent change in SFM height images (z-range = 1.30 μm) of the (MI/MT-SiO<sub>1.5</sub>)<sub>n</sub>-ZnCl<sub>2</sub> hybrid film in the vicinity of the scratch. The sample was heated at 80 °C for (a) 0 min, (b) 5 min, and (c) 10 min.

Table S2. The mechanical properties of zinc/imidazole-based hybrids.

| Entry                                                       | ε max (%) <sup>a</sup> | σ max (MPa) <sup>b</sup> | Young's modulus (GPa) <sup>c</sup> |
|-------------------------------------------------------------|------------------------|--------------------------|------------------------------------|
| (MI/MT-SiO <sub>1.5</sub> ) <sub>n</sub> -ZnCl <sub>2</sub> | 0.445 ± 0.22           | 8.55 ± 1.46              | 2.13 ± 0.59                        |
| (MI/Bu-SiO <sub>1.5</sub> ) <sub>n</sub> -ZnCl <sub>2</sub> | 0.402 ± 0.11           | 7.378 ± 1.70             | 1.05 ± 0.07                        |
| (MI/Ud-SiO <sub>1.5</sub> ) <sub>n</sub> -ZnCl <sub>2</sub> | 0.560 ± 0.04           | 3.57 ± 0.51              | 0.56 ± 0.16                        |

a) Ultimate extensibility, b) ultimate tensile stress, c) calculated from small strain region (0.05-0.25 %). The results were obtained from the flexural stress-strain tests.
